# Supplementary material
Source: Springer Nature journal article supplement (https://www.springermedizin.de/resource/supplementary/12885_2014_4977_MOESM2_ESM.pdf/9467938)

## Primary Data

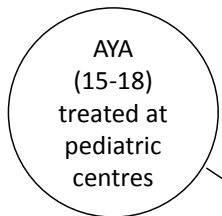

POGONIS database

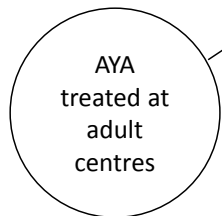

Chart Abstraction

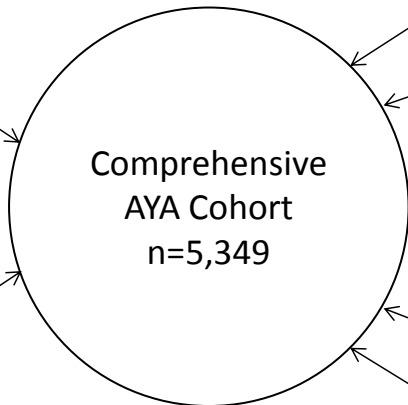

## Administrative Data

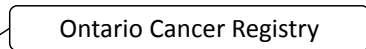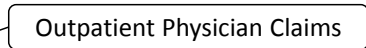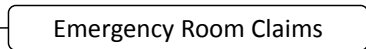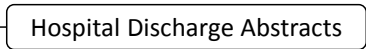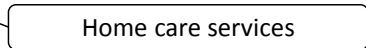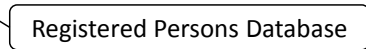

Supplement: MOESM2 [file 9467938]
